# Supplementary material
Source: PubMed Central journal article supplement (PMC8672281)
Supplement: EMBJ-40-e108944-s001.pdf [file EMBJ-40-e108944-s001.pdf]

## Expanded View Figures

**Figure EV1. Qualitative and quantitative assessment of syncytia formation.**

- A U2OS-ACE2 GFP-split cells were infected at MOI 0.01 with the Wuhan, D614G, Alpha, and Beta strains for 20 h. Cells were stained for S protein with the human pan-SARS-CoV-2 102 mAb and Alex647 fluorescent secondary antibody. Representative confocal images of the variant induced syncytia formation: GFP-Split (green), Spike (red), and Hoechst (blue). Scale bars: 50  $\mu$ m.
- B Quantification method for syncytia formation using the Opera Phenix high content imager and harmony software: Total syncytia area (GFP area) is normalized for cell number upon quantifying the number of nuclei (Hoechst).

A

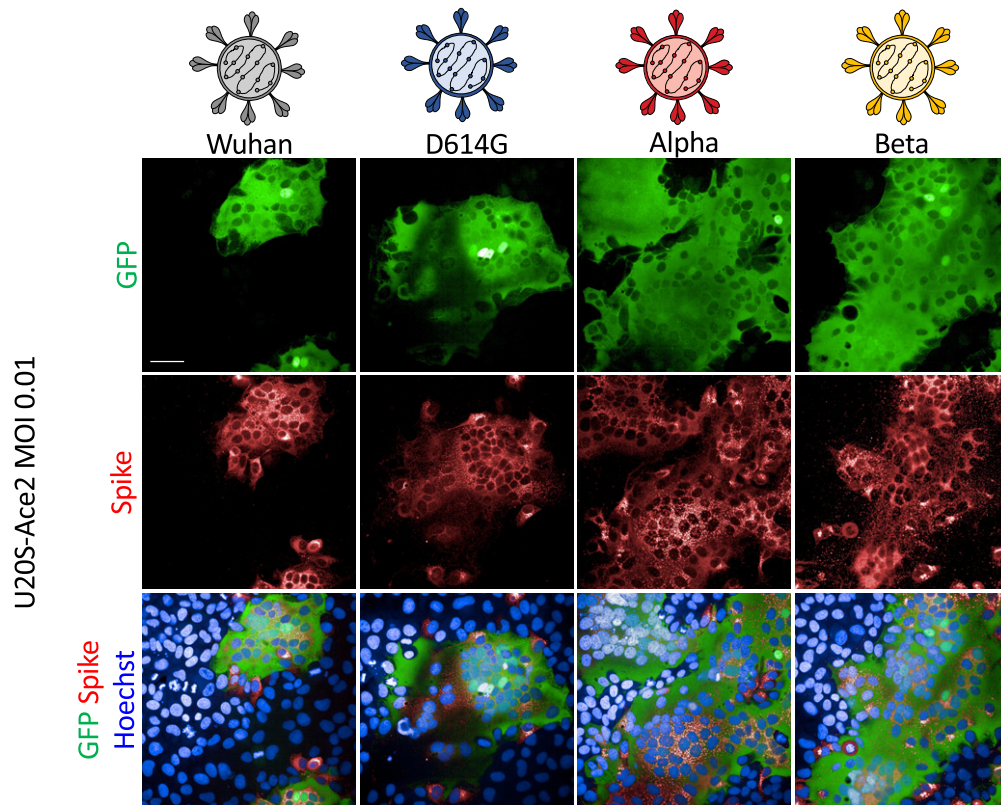

B

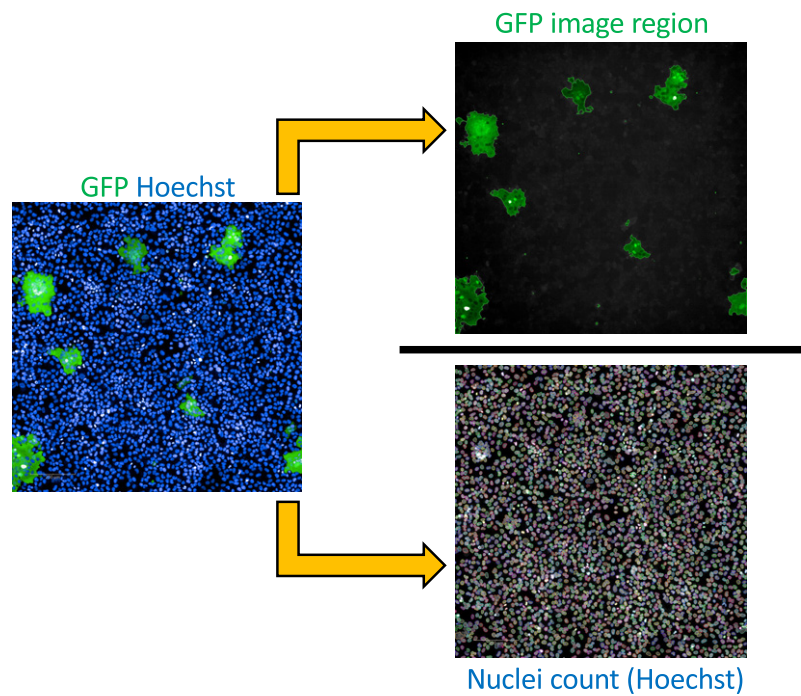

Figure EV1.

**Figure EV2. SARS-CoV-2 variant S proteins are expressed equally at the cell surface.**

293T cells were transfected with variant S proteins for 20 h and stained with human pan-coronavirus mAb10 without permeabilization. 293T cells were chosen because they lack ACE2 and do not fuse upon S transfection; this makes them suitable for single-cell flow cytometry.

- A Left Panel: Quantification of percent of cells expressing each S protein at the surface. Right Panel: Representative FACS plots.
- B Quantification of median fluorescent intensity (MFI) of variant S protein at the cell surface and representative histograms of MFI of the Wuhan, D614G, Alpha, Beta, and Alpha + E484K variants S protein using mAb10.
- C Quantification of median fluorescent intensity (MFI) of variant S protein at the cell surface and representative histograms of MFI of the Wuhan, D614G, Alpha, Beta, and Alpha + E484K variants S protein using mAb129.
- D Quantification of median fluorescent intensity (MFI) of variant S protein at the cell surface and representative histograms of MFI of the Delta variant compared with the Alpha and D614G using mAb129.
- E Controlled acceptor/donor experiment 293T GFP1-10 donor cells transfected with S protein and verified to have equal S protein expression on the surface (top), were then added to Vero GFP11 acceptor cells (bottom) to assess fusion.

Data information: Flow cytometry data are mean  $\pm$  SD of at least three independent experiments. Statistical analysis: one-way ANOVA compared with D614G reference, ns: non-significant, \* $P < 0.05$ , \*\*\*\* $P < 0.0001$ .

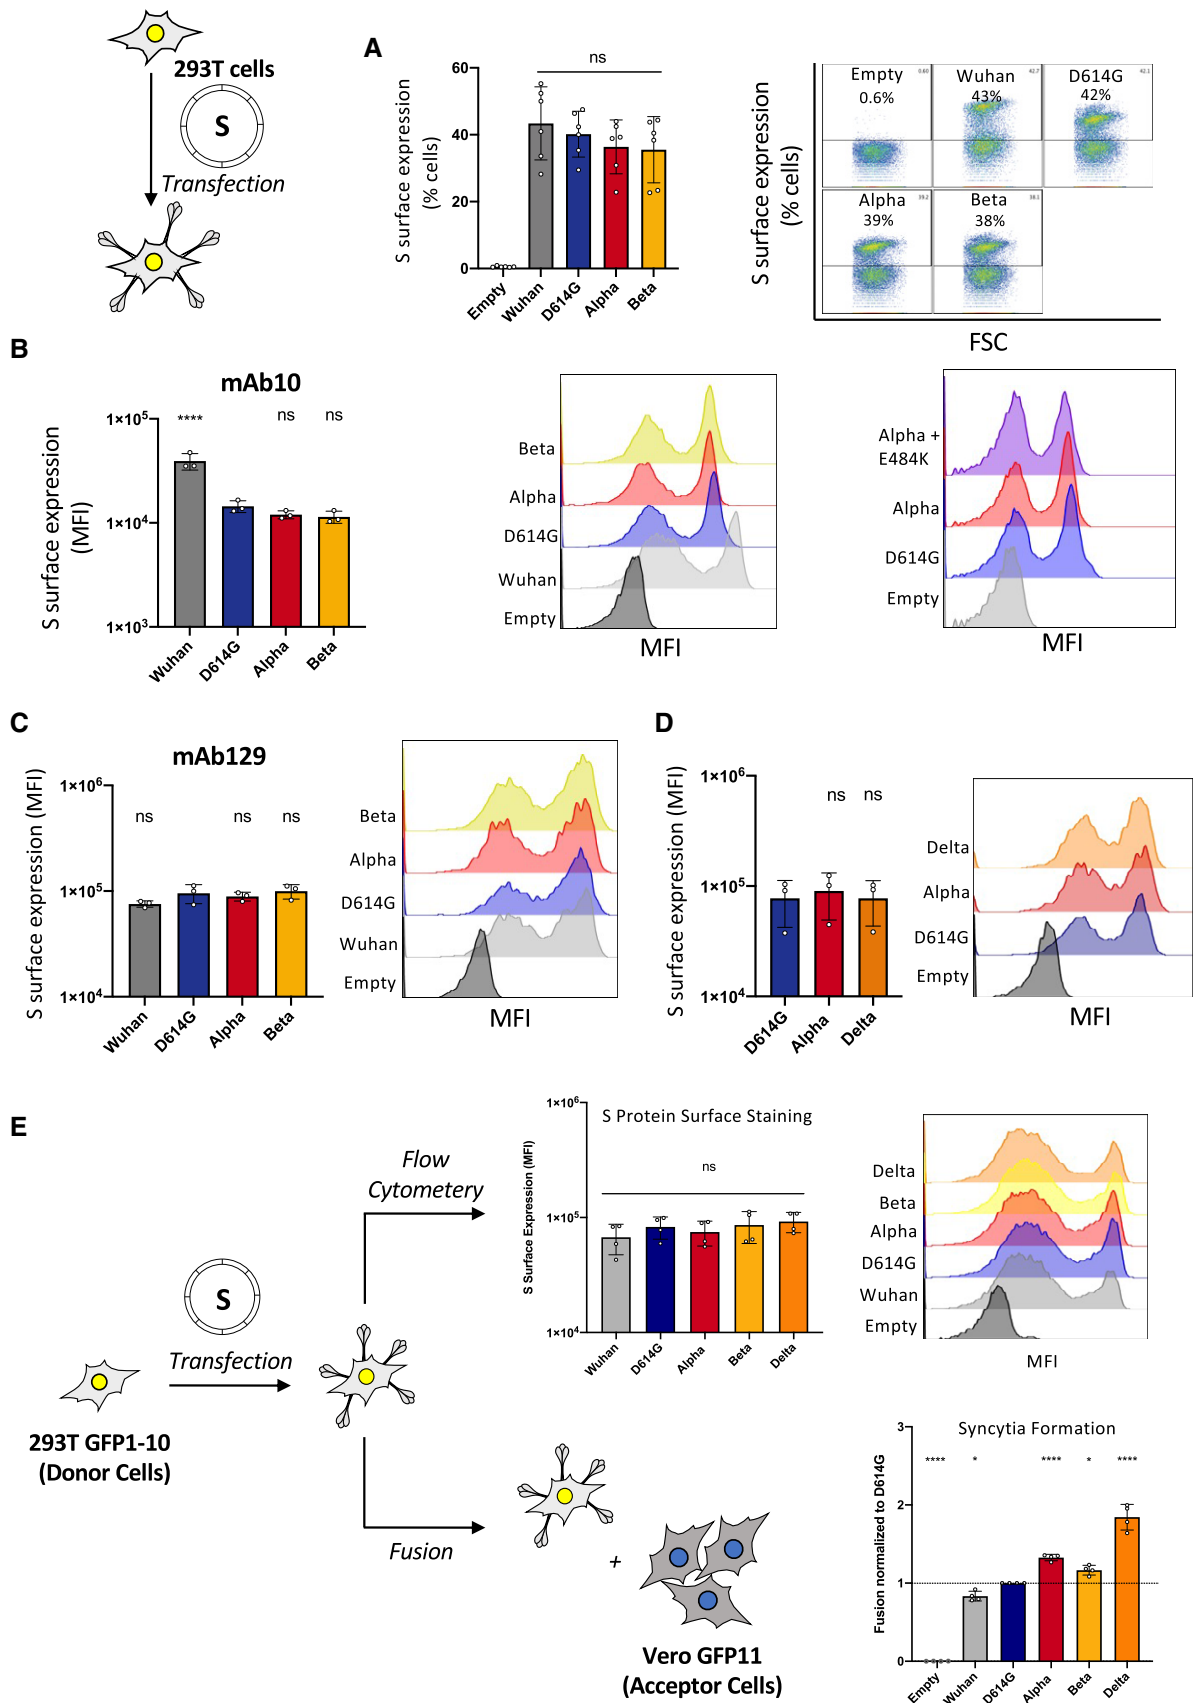

Figure EV2.

**Figure EV3. Impact of IFN- $\beta$ 1 and IFITMs on SARS-CoV-2 variant replication and S protein-mediated cell–cell fusion.**

- A Vero cells were pre-treated for 2 h with a serial dilution of IFN- $\beta$ 1 prior to infection with the SARS-CoV-2 variants. Infected cells were maintained in media containing IFN- $\beta$ 1 and analyzed by flow cytometry 48 h post-infection to determine relative infection change.
- B U2OS-ACE2 GFP-split cells were pre-treated for 2 h with a serial dilution of IFN- $\beta$ 1 prior to infection with the SARS-CoV-2 variants. Infected cells were maintained in media containing IFN- $\beta$ 1 and relative inhibition of syncytia formation 20 h post-infection was determined via GFP signal.
- C–G A co-culture of 293T GFP-Split cells were transfected with combination of S, control, ACE2, TMPRSS2, and IFITM plasmids and then imaged 18 h post-transfection. Effect of IFITMs and TMPRSS2 on the cell–cell fusion induced by different S proteins, (D) Wuhan, (E) D614G, (F) Alpha, and (G) Beta.

Data information: Data are mean  $\pm$  SD of at least three independent experiments. Statistical analysis: one-way ANOVA compared with D614G reference or control plasmid transfection, ns: non-significant, \* $P$  < 0.05, \*\* $P$  < 0.01, \*\*\* $P$  < 0.001, \*\*\*\* $P$  < 0.0001.

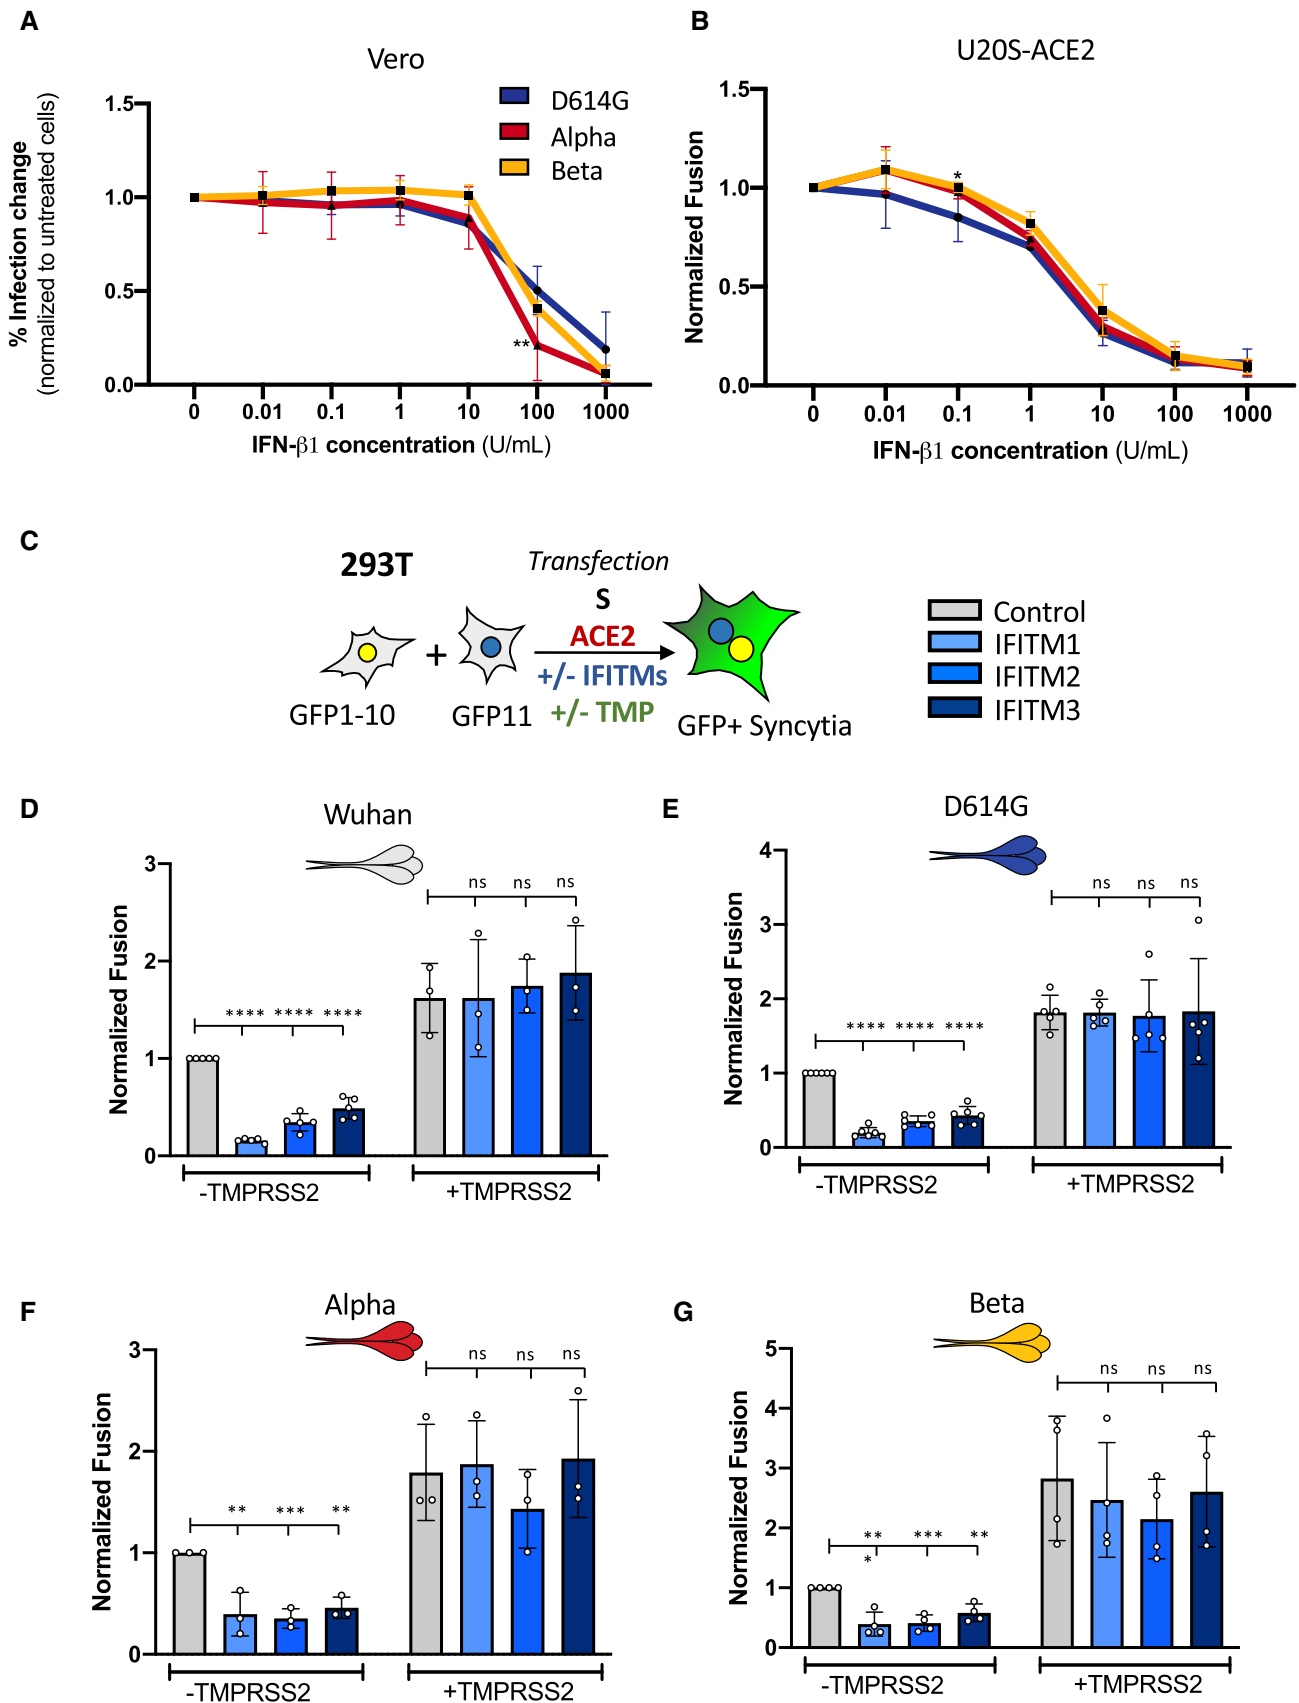

Figure EV3.

**Figure EV4. SARS-CoV-2 variant S protein-associated mutations are expressed equally at the cell surface.**

293T cells were transfected with S proteins with each of the variant-associated mutations for 18 h and stained with human pan-coronavirus mAb10 without permeabilization.

- A Representative FAC plots of percent of cells expressing each mutant S protein at the surface.
- B Quantification of percent of cells expressing each S protein at the surface.
- C Quantification of median florescent intensity (MFI) of the mutant S protein at the cell surface.
- D Representative histograms of MFI of each mutant S protein.
- E Representative images of Vero GFP-split cells 20 h after transfection with each Alpha variant-associated mutant S protein, GFP-Split (Green). Scale bars: 200  $\mu$ m.
- F Representative images of Vero GFP-split cells 20 h after transfection with each Beta variant-associated mutant S protein. Scale bars: 200  $\mu$ m.

Data information: Data are mean  $\pm$  SD of at least three independent experiments. Statistical analysis: one-way ANOVA compared with D614G reference, ns: non-significant.

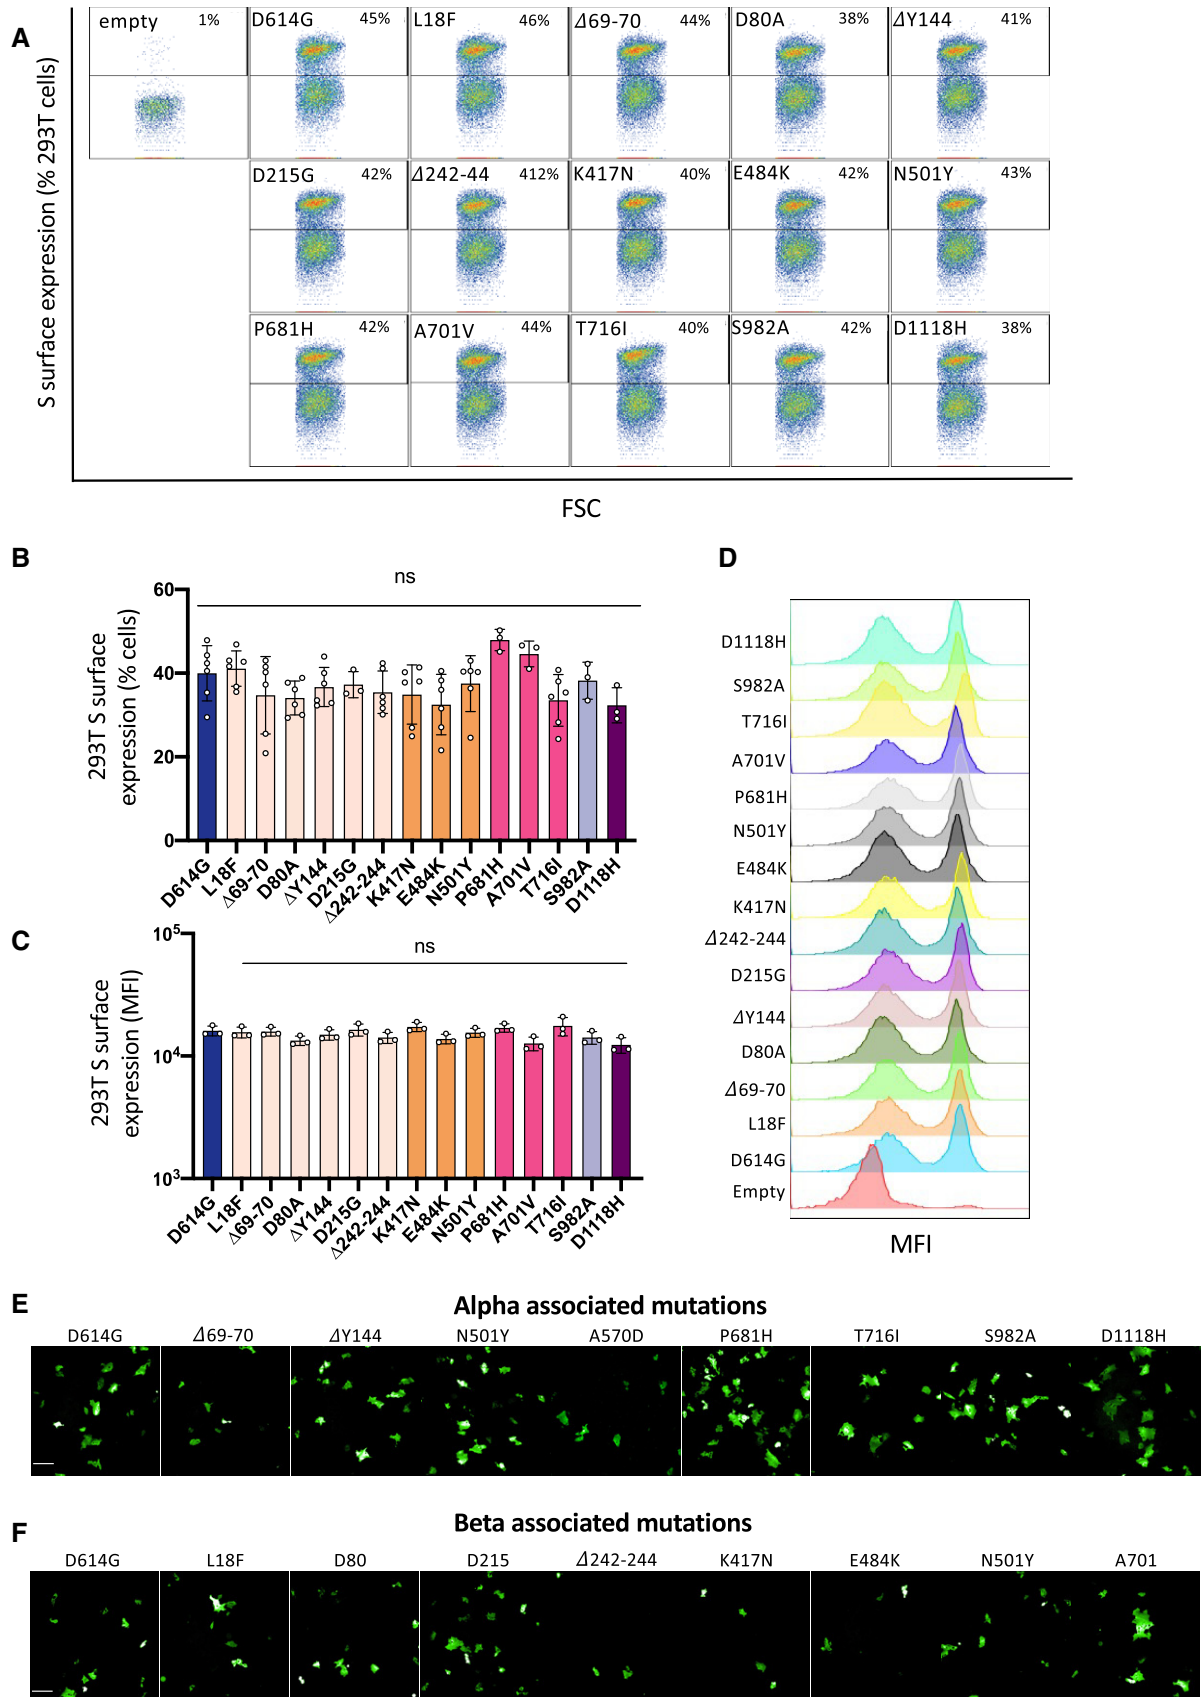

Figure EV4.



**Figure EV5. ACE2 binding curves to SARS-CoV-2 variant S proteins and associated mutations.**

293T cells were transfected with variant or mutant S proteins for 24 h and stained with a serial dilution of soluble biotinylated ACE2 and revealed by fluorescent streptavidin before analysis by flow cytometry.

A ACE2 binding dilution curves of each variant S protein.

B–E ACE2 binding dilution curves of each variant-associated mutation located in (B) S protein n-terminal domain (NTD), (C) receptor-binding domain (RBD), (D) S1/S2 cleavage site, and (E) heptad repeat 1–2 site (HR1–HR2).

Data information: Data are mean  $\pm$  SD of three independent experiments.

**A**

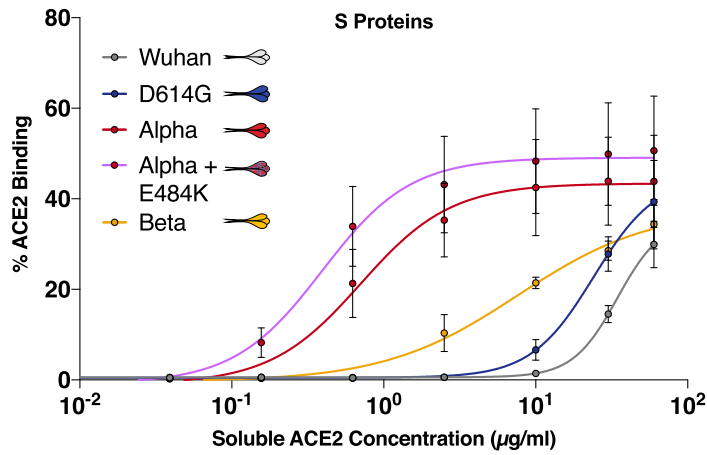

**B**

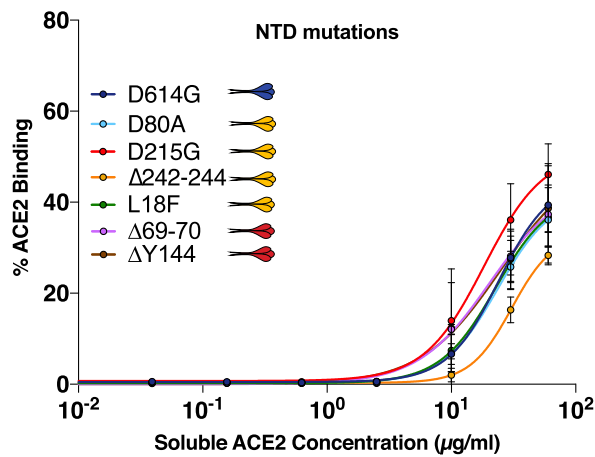

**C**

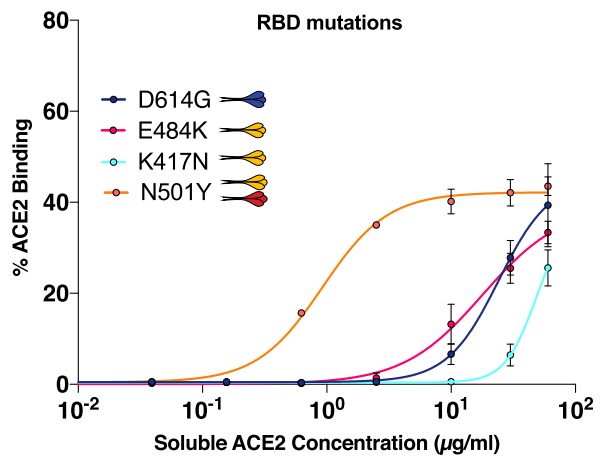

**D**

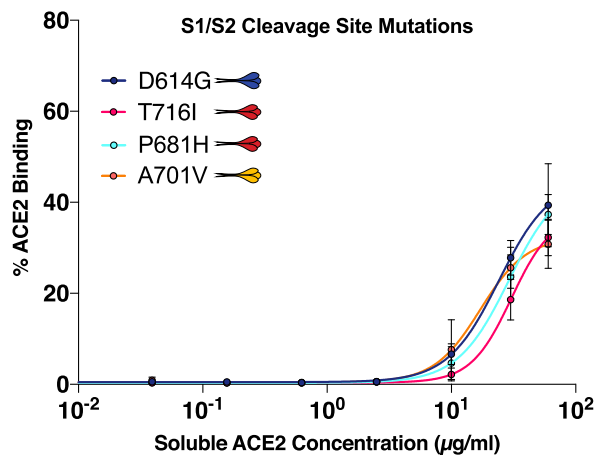

**E**

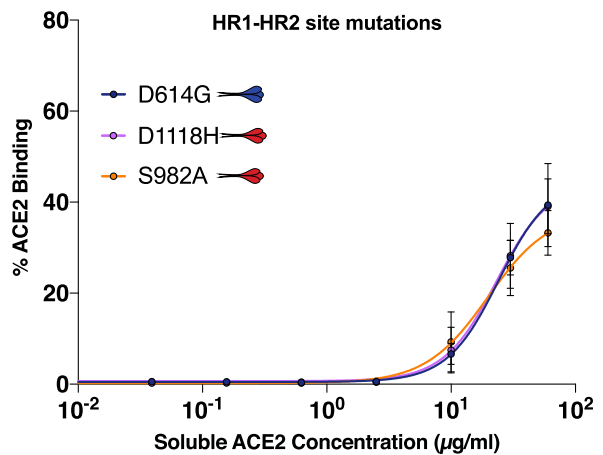

Figure EV5.
