# Supplementary material
Source: PubMed Central journal article supplement (PMC8672281)

| Spike   | - |   | D614G |   | Alpha |   | Beta |   | Delta |   |
|---------|---|---|-------|---|-------|---|------|---|-------|---|
| TMPRSS2 | - | + | -     | + | -     | + | -    | + | -     | + |

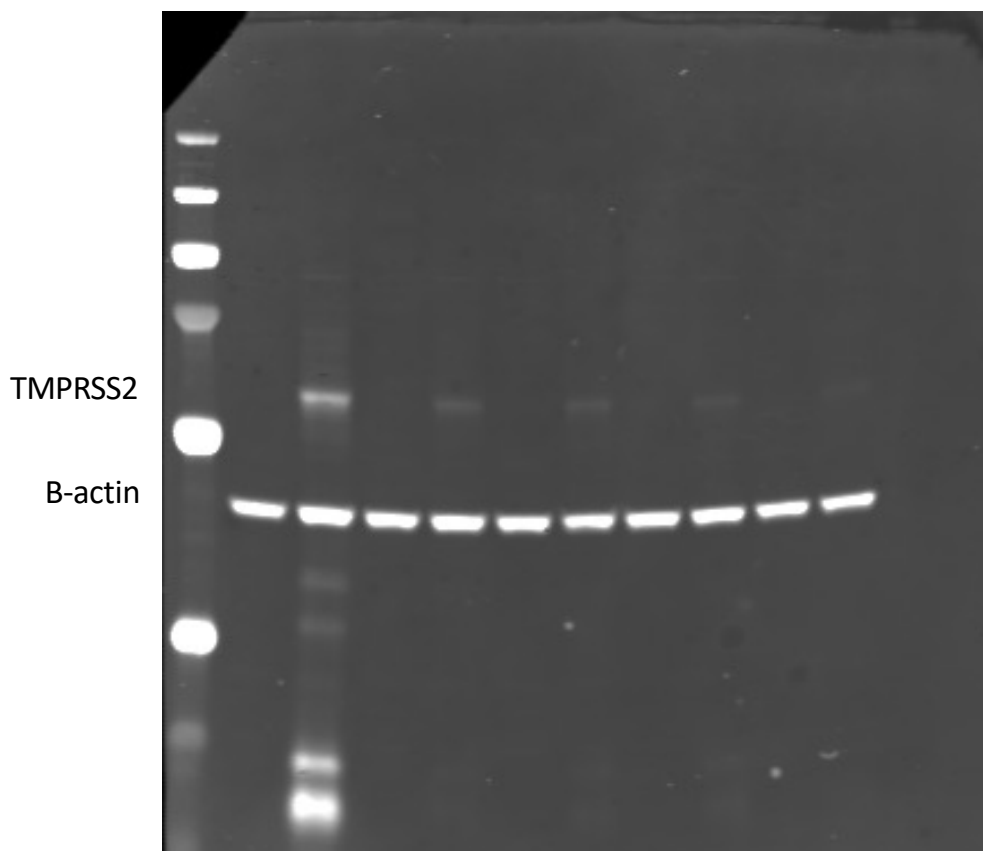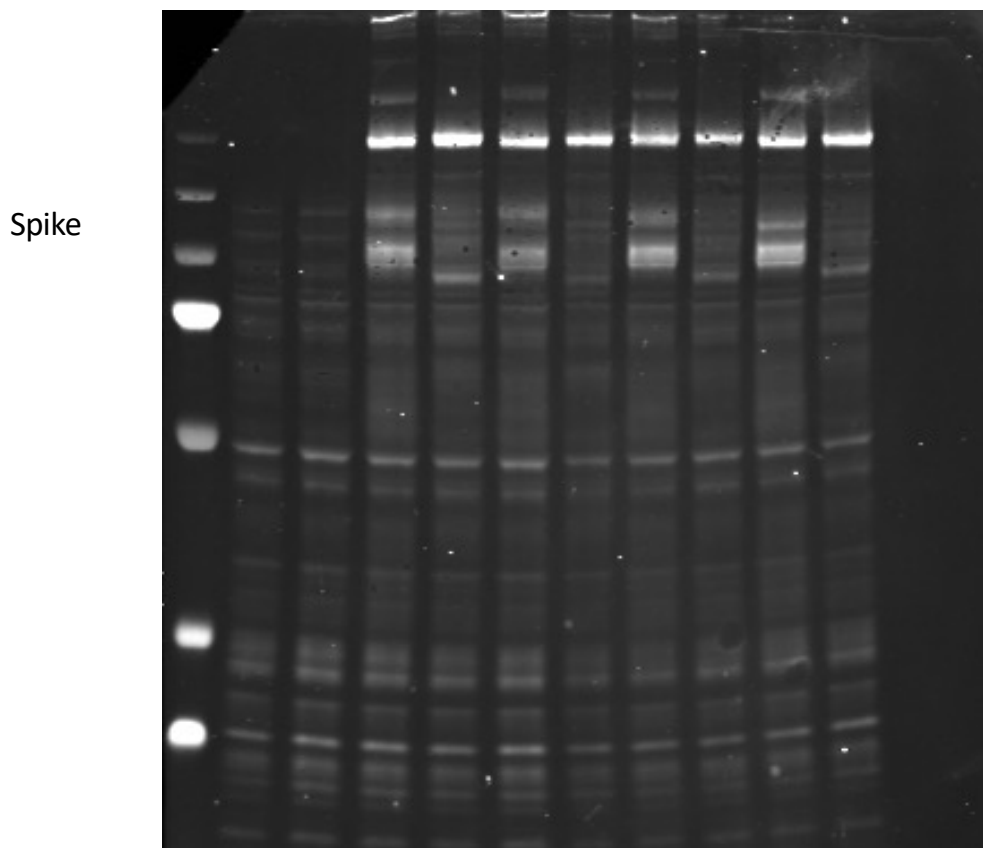

| Spike   | - |   | D614G |   | Alpha |   | Beta |   | Delta |   |
|---------|---|---|-------|---|-------|---|------|---|-------|---|
| TMPRSS2 | - | + | -     | + | -     | + | -    | + | -     | + |

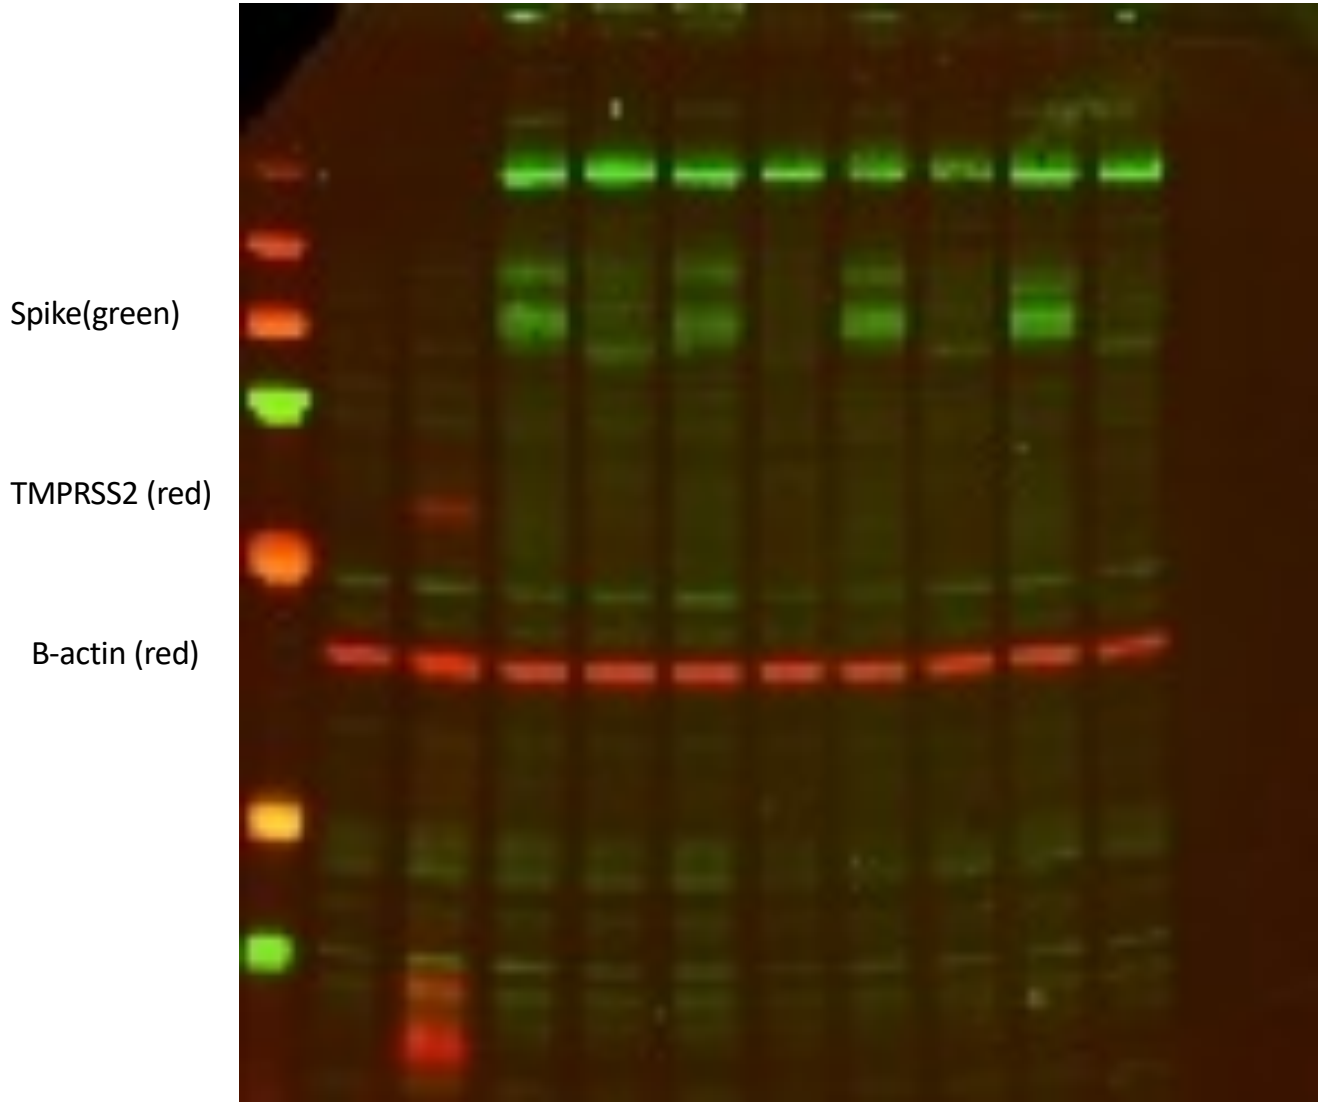

Supplement: EMBJ-40-e108944-s005.pdf [file EMBJ-40-e108944-s005.pdf]
